# Supplementary material for: Metabolic Signatures of Triatomine Vectors of Trypanosoma cruzi Unveiled by Metabolomics
Source: PLoS One. 2013 Oct 30;8(10):e77283. doi: 10.1371/journal.pone.0077283 (PMC3813737; doi:10.1371/journal.pone.0077283)
Supplement: Table S6 — Metabolic classes in the uniform and variable cores of T. infestans (Ti), R. prolixus (Rp) and P. megistus (Pm). (XLSX) [file pone.0077283.s007.xlsx]

## Sheet: Table S2
Table S6. Metabolic classes in the uniform and variable cores of T. infestans (Ti), R. prolixus (Rp) and P. megistus (Pm).
Metabolic classes*	Uniform core		Pm vs Rp&Ti		Rp vs Pm&Ti		Ti vs Pm&Rp
	Number of hits	% of total	Number of hits	% of total	Number of hits	% of total	Number of hits	% of total
Acenes	17	1.11916	5	1.25945	2	0.649351	3	0.837989
Acetals	5	0.329164	1	0.251889	0	0	1	0.27933
Acetophenones	12	0.789993	4	1.00756	3	0.974026	3	0.837989
Acryloyl Compounds	3	0.197498	1	0.251889	0	0	1	0.27933
Acyclic Alkanes	2	0.131666	1	0.251889	0	0	1	0.27933
Acyclic Alkenes	0	0	0	0	0	0	0	0
Acyloins	1	0.0658328	0	0	0	0	0	0
Aflatoxins	1	0.0658328	0	0	0	0	0	0
Alcohols And Polyols	4	0.263331	1	0.251889	1	0.324675	0	0
Alkyl Aryl Ethers	3	0.197498	1	0.251889	0	0	1	0.27933
Alkyl Glycosides	2	0.131666	1	0.251889	1	0.324675	0	0
Alkylamines	4	0.263331	1	0.251889	1	0.324675	0	0
Alkynes	0	0	0	0	0	0	0	0
Aminals	1	0.0658328	0	0	0	0	0	0
Amino Acids And Derivatives	91	5.99078	22	5.54156	16	5.19481	20	5.58659
Amino Sugars	1	0.0658328	0	0	0	0	0	0
Anilides	7	0.460829	2	0.503778	1	0.324675	1	0.27933
Aporphines	1	0.0658328	0	0	0	0	0	0
Azepines	1	0.0658328	0	0	2	0.649351	2	0.558659
Azoles	0	0	0	0	0	0	0	0
Benzaldehydes	1	0.0658328	0	0	0	0	0	0
Benzamides	2	0.131666	1	0.251889	0	0	0	0
Benzenesulfonamides	4	0.263331	1	0.251889	1	0.324675	0	0
Benzenesulfonic Acid Derivatives	4	0.263331	1	0.251889	0	0	0	0
Benzimidazoles	0	0	0	0	0	0	0	0
Benzodiazepines	12	0.789993	3	0.755668	2	0.649351	3	0.837989
Benzodioxoles	3	0.197498	1	0.251889	0	0	1	0.27933
Benzofurans	13	0.855826	4	1.00756	4	1.2987	4	1.11732
Benzoic Acid And Derivatives	24	1.57999	7	1.76322	0	0	8	2.23464
Benzophenones	1	0.0658328	0	0	0	0	0	0
Benzopyrans	45	2.96248	11	2.77078	6	1.94805	8	2.23464
Benzoquinones	6	0.394997	2	0.503778	1	0.324675	1	0.27933
Benzothiophenes	0	0	0	0	0	0	0	0
Benzotriazoles	0	0	0	0	0	0	0	0
Benzoxazepines	1	0.0658328	0	0	0	0	0	0
Benzoxazines	3	0.197498	1	0.251889	2	0.649351	2	0.558659
Benzoxazoles	2	0.131666	1	0.251889	1	0.324675	2	0.558659
Benzoxepines	1	0.0658328	0	0	0	0	0	0
Benzoyl Derivatives	1	0.0658328	0	0	0	0	0	0
Benzyl Alcohols And Derivatives	1	0.0658328	0	0	0	0	0	0
Benzyloxycarbonyls	2	0.131666	1	0.251889	0	0	1	0.27933
Beta Lactams	5	0.329164	1	0.251889	0	0	1	0.27933
Bile Acids And Derivatives	7	0.460829	2	0.503778	1	0.324675	1	0.27933
Biphenyls And Derivatives	1	0.0658328	0	0	0	0	0	0
Bipyridines	6	0.394997	2	0.503778	1	0.324675	1	0.27933
Butyrophenones	3	0.197498	1	0.251889	2	0.649351	1	0.27933
Carbonyl Compounds	15	0.987492	4	1.00756	2	0.649351	4	1.11732
Carboxylic Acids And Derivatives	27	1.77749	8	2.01511	3	0.974026	5	1.39665
Cinnamaldehydes	1	0.0658328	0	0	0	0	0	0
Cinnamic Acid Derivatives	13	0.855826	4	1.00756	1	0.324675	3	0.837989
Cumenes	2	0.131666	1	0.251889	0	0	1	0.27933
Curcuminoids	0	0	0	0	1	0.324675	1	0.27933
Cyclic Alcohols And Derivatives	6	0.394997	2	0.503778	3	0.974026	1	0.27933
Cycloalkanes	6	0.394997	2	0.503778	1	0.324675	1	0.27933
Cycloalkenes	3	0.197498	1	0.251889	1	0.324675	0	0
Depsides And Depsidones	6	0.394997	2	0.503778	2	0.649351	1	0.27933
Diazines	5	0.329164	1	0.251889	1	0.324675	2	0.558659
Dibenzylbutane Lignans	3	0.197498	1	0.251889	0	0	1	0.27933
Dibenzylbutyrolactols	2	0.131666	1	0.251889	0	0	1	0.27933
Dihydrofurans	1	0.0658328	0	0	0	0	0	0
Dioxanes	5	0.329164	1	0.251889	1	0.324675	0	0
Dioxolanes	10	0.658328	3	0.755668	1	0.324675	2	0.558659
Dioxolopyrans	1	0.0658328	0	0	0	0	0	0
Diphenylmethanes	5	0.329164	1	0.251889	0	0	1	0.27933
Disaccharides	14	0.921659	4	1.00756	1	0.324675	3	0.837989
Dithiolanes	1	0.0658328	0	0	0	0	0	0
Eicosanoids	16	1.05332	4	1.00756	4	1.2987	4	1.11732
Ellagic Acids And Derivatives	1	0.0658328	0	0	0	0	0	0
Enol Ethers	3	0.197498	1	0.251889	1	0.324675	2	0.558659
Epoxides	2	0.131666	1	0.251889	0	0	1	0.27933
Ergopeptines	0	0	0	0	0	0	0	0
Ethers	0	0	0	0	0	0	0	0
Fatty Acid Esters	57	3.75247	15	3.77834	10	3.24675	12	3.35196
Fatty Acids	58	3.8183	21	5.28967	13	4.22078	14	3.91061
Fatty Acyl Glycosides	1	0.0658328	0	0	0	0	0	0
Fatty Alcohol Esters	28	1.84332	10	2.51889	16	5.19481	16	4.46927
Fatty Alcohols	27	1.77749	8	2.01511	10	3.24675	11	3.07263
Fatty Aldehydes	6	0.394997	2	0.503778	0	0	2	0.558659
Fatty Amides	9	0.592495	3	0.755668	0	0	3	0.837989
Flavonoids	55	3.6208	14	3.52645	10	3.24675	8	2.23464
Flavonolignans	2	0.131666	0	0	1	0.324675	1	0.27933
Furan Lignans	2	0.131666	0	0	0	0	0	0
Furans	11	0.724161	3	0.755668	3	0.974026	2	0.558659
Furofuran Lignans	4	0.263331	1	0.251889	0	0	1	0.27933
Furofurans	2	0.131666	0	0	1	0.324675	1	0.27933
Glycerolipids	53	3.48914	13	3.27456	13	4.22078	13	3.63128
Glycerophospholipids	49	3.22581	12	3.02267	9	2.92208	8	2.23464
Glycinamide Ribonucleotides	1	0.0658328	0	0	0	0	0	0
Glycosyl Compounds	26	1.71165	7	1.76322	8	2.5974	8	2.23464
Guanidines	1	0.0658328	0	0	0	0	0	0
Halobenzenes	2	0.131666	1	0.251889	1	0.324675	0	0
Harmala Alkaloids	2	0.131666	0	0	0	0	0	0
Homogeneous Transition Metal Compounds	1	0.0658328	0	0	0	0	0	0
Hydrolyzable Tannins	6	0.394997	2	0.503778	2	0.649351	2	0.558659
Hydropyridines	2	0.131666	0	0	0	0	0	0
Hydroxy Acids And Derivatives	4	0.263331	1	0.251889	1	0.324675	2	0.558659
Imidazole Nucleosides And Nucleotides	1	0.0658328	0	0	0	0	0	0
Imidazoles	5	0.329164	1	0.251889	2	0.649351	1	0.27933
Imidazolidines	1	0.0658328	0	0	0	0	0	0
Imidazopyrimidines	2	0.131666	0	0	0	0	0	0
Imines	1	0.0658328	0	0	0	0	0	0
Indanes	1	0.0658328	0	0	0	0	0	0
Indazoles	1	0.0658328	0	0	1	0.324675	1	0.27933
Indolequinones	1	0.0658328	0	0	0	0	0	0
Indoles	17	1.11916	5	1.25945	3	0.974026	5	1.39665
Indolizidines	2	0.131666	0	0	0	0	0	0
Isoindoles And Derivatives	1	0.0658328	0	0	0	0	0	0
Isoquinolines	6	0.394997	2	0.503778	2	0.649351	0	0
Isothiocyanates	1	0.0658328	0	0	0	0	0	0
Keto-Acids And Derivatives	8	0.526662	2	0.503778	4	1.2987	2	0.558659
Lactones	9	0.592495	3	0.755668	0	0	3	0.837989
Lignan Glycosides	2	0.131666	1	0.251889	0	0	1	0.27933
Lignan Lactones	4	0.263331	1	0.251889	0	0	1	0.27933
Lignans And Norlignans	1	0.0658328	0	0	0	0	0	0
Lineolic Acids And Derivatives	14	0.921659	4	1.00756	3	0.974026	3	0.837989
Macrolides And Analogues	10	0.658328	3	0.755668	0	0	3	0.837989
Monosaccharides	28	1.84332	10	2.51889	5	1.62338	8	2.23464
Morphinans	2	0.131666	0	0	2	0.649351	2	0.558659
Naphthofurans	2	0.131666	0	0	0	0	0	0
Naphthopyrans	1	0.0658328	0	0	0	0	0	0
Naphthyridines	1	0.0658328	0	0	0	0	0	0
Nitrobenzenes	1	0.0658328	0	0	0	0	0	0
No Annotation**	14	0.921659	4	1.00756	4	1.2987	2	0.558659
Okadaic Acids And Derivatives	0	0	0	0	1	0.324675	1	0.27933
Oligosaccharides	6	0.394997	2	0.503778	1	0.324675	1	0.27933
Organic Disulfides	3	0.197498	1	0.251889	1	0.324675	0	0
Organic Oxoanionic Compounds	1	0.0658328	0	0	0	0	0	0
Organic Phosphoric Acids And Derivatives	11	0.724161	3	0.755668	3	0.974026	0	0
Organic Sulfuric Acids And Derivatives	0	0	0	0	1	0.324675	1	0.27933
Organofluorides	1	0.0658328	0	0	0	0	0	0
Oxanes	1	0.0658328	0	0	0	0	0	0
Oxazinanes	0	0	0	0	0	0	0	0
Oxepanes	1	0.0658328	0	0	0	0	0	0
Oxocins	1	0.0658328	0	0	0	0	0	0
Oxolanes	3	0.197498	1	0.251889	0	0	1	0.27933
Peptides	1	0.0658328	0	0	0	0	0	0
Phenanthrenes And Derivatives	8	0.526662	2	0.503778	2	0.649351	4	1.11732
Phenethylamines	6	0.394997	1	0.251889	0	0	1	0.27933
Phenols And Derivatives	59	3.88413	21	5.28967	20	6.49351	22	6.14525
Phenothiazines	0	0	0	0	0	0	0	0
Phenoxazines	1	0.0658328	0	0	0	0	0	0
Phenoxyacetic Acid Derivatives	1	0.0658328	0	0	0	0	0	0
Phenylacetaldehydes	1	0.0658328	0	0	0	0	0	0
Phenylacetic Acid Derivatives	10	0.658328	3	0.755668	1	0.324675	2	0.558659
Phenylbutylamines	2	0.131666	0	0	1	0.324675	1	0.27933
Phenylhydrazines	1	0.0658328	0	0	0	0	0	0
Phenylmethylamines	6	0.394997	1	0.251889	1	0.324675	0	0
Phenylpiperazines	4	0.263331	1	0.251889	0	0	1	0.27933
Phenylpiperidines	0	0	0	0	0	0	0	0
Phenylpropenes	6	0.394997	2	0.503778	2	0.649351	0	0
Phenylpyrazoles	1	0.0658328	0	0	0	0	0	0
Phenyltetrazoles And Derivatives	2	0.131666	0	0	0	0	0	0
Phenyltriazoles	1	0.0658328	0	0	0	0	0	0
Piperazines	1	0.0658328	0	0	0	0	0	0
Piperidines	5	0.329164	1	0.251889	0	0	1	0.27933
Prenol Lipids	134	8.82159	31	7.80856	35	11.3636	29	8.10056
Proanthocyanidins	2	0.131666	0	0	0	0	0	0
Pteridines And Derivatives	5	0.329164	1	0.251889	2	0.649351	1	0.27933
Purines And Derivatives	24	1.57999	6	1.51134	4	1.2987	2	0.558659
Pyrans	9	0.592495	3	0.755668	1	0.324675	2	0.558659
Pyrazoles	2	0.131666	0	0	0	0	0	0
Pyrazolopyrimidine Nucleosides And Nucleotides	1	0.0658328	0	0	0	0	0	0
Pyridines And Derivatives	6	0.394997	2	0.503778	2	0.649351	4	1.11732
Pyridopyrimidines	1	0.0658328	0	0	0	0	0	0
Pyrimidines And Derivatives	23	1.51415	6	1.51134	3	0.974026	6	1.67598
Pyrrolidines	3	0.197498	1	0.251889	1	0.324675	0	0
Pyrrolines	1	0.0658328	0	0	0	0	0	0
Pyrrolizines	1	0.0658328	0	0	0	0	0	0
Pyrrolopyrazines	2	0.131666	0	0	0	0	0	0
Pyrrolopyrimidines	2	0.131666	0	0	0	0	0	0
Quinazolines	2	0.131666	1	0.251889	1	0.324675	0	0
Quinolines And Derivatives	8	0.526662	2	0.503778	5	1.62338	3	0.837989
Quinoxalines	1	0.0658328	0	0	0	0	0	0
Saxitoxins, Gonyautoxins, And Derivatives	3	0.197498	1	0.251889	1	0.324675	2	0.558659
Sphingolipids	20	1.31666	5	1.25945	3	0.974026	3	0.837989
Steroids	53	3.48914	12	3.02267	14	4.54545	17	4.7486
Stilbenes	10	0.658328	3	0.755668	0	0	2	0.558659
Styrenes	2	0.131666	1	0.251889	0	0	1	0.27933
Sugar Acids And Derivatives	10	0.658328	3	0.755668	0	0	3	0.837989
Sulfanilides	2	0.131666	0	0	0	0	0	0
Sulfonyls	2	0.131666	0	0	1	0.324675	1	0.27933
Sulfoxides	5	0.329164	1	0.251889	1	0.324675	1	0.27933
Tetralins	1	0.0658328	0	0	0	0	0	0
Tetrapyrroles And Derivatives	4	0.263331	1	0.251889	1	0.324675	0	0
Tetrasaccharides	3	0.197498	1	0.251889	0	0	1	0.27933
Thiamines	1	0.0658328	0	0	0	0	0	0
Thiazoles	4	0.263331	1	0.251889	1	0.324675	0	0
Thiazolidines	2	0.131666	0	0	0	0	0	0
Thiazolines	1	0.0658328	0	0	0	0	0	0
Thienoimidazolidines	1	0.0658328	0	0	0	0	0	0
Thienopyridines	2	0.131666	0	0	0	0	0	0
Thioacetals	2	0.131666	0	0	0	0	0	0
Thiocyanates	1	0.0658328	0	0	0	0	0	0
Thioethers	1	0.0658328	0	0	0	0	0	0
Thiolanes	0	0	0	0	0	0	0	0
Thiols	2	0.131666	1	0.251889	0	0	2	0.558659
Thiophenes	1	0.0658328	0	0	0	0	0	0
Toluenes	4	0.263331	1	0.251889	0	0	1	0.27933
Triazolopyrimidines	0	0	0	0	0	0	0	0
Trichothecenes	4	0.263331	1	0.251889	0	0	1	0.27933
Trioxanes	0	0	0	0	1	0.324675	1	0.27933
Trisaccharides	7	0.460829	2	0.503778	2	0.649351	2	0.558659
Tropanes	2	0.131666	0	0	0	0	0	0
Ureas	0	0	0	0	0	0	0	0
TOTAL	1519	100	397	100	308	100	358	100
AVERAGE	7.44608	0.490196	1.94608	0.490196	1.5098	0.490196	1.7549	0.490196
*Whenever a given metabolite produced multiple hits in the database search, only one assignment among redundant hits from the same metabolic category was considered. Gray areas are used to evidence metabolic classes with a number of hits larger than the average.
**No Annotation indicates metabolites that had hits on HMDB, but without annotation at the Class or Subclass level.
